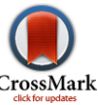

## Correction

# Correction: Investigating microRNA-Target Interaction-Supported Tissues in Human Cancer Tissues Based on miRNA and Target Gene Expression Profiling

The *PLOS ONE* Staff

There is an error in the “Authorship Contributions.” Both Dr. Wan J. Hsieh and Dr. Feng-Mao Lin are joint first authors for this article.

## Reference

1. Hsieh WJ, Lin F-M, Huang H-D, Wang H (2014) Investigating microRNA-Target Interaction-Supported Tissues in Human Cancer Tissues Based on miRNA and Target Gene Expression Profiling. *PLoS ONE* 9(4): e95697. doi:10.1371/journal.pone.0095697

**Citation:** The *PLOS ONE* Staff (2014) Correction: Investigating microRNA-Target Interaction-Supported Tissues in Human Cancer Tissues Based on miRNA and Target Gene Expression Profiling. *PLoS ONE* 9(7): e102769. doi:10.1371/journal.pone.0102769

**Published:** July 9, 2014

**Copyright:** © 2014 The *PLOS ONE* Staff. This is an open-access article distributed under the terms of the Creative Commons Attribution License, which permits unrestricted use, distribution, and reproduction in any medium, provided the original author and source are credited.
